# Supplementary material for: Connecting micelles by metallo-supramolecular interactions: towards stimuli responsive hierarchical materials
Source: Royal Society of Chemistry journal article supplement (doi:10.1039/b910325b), 2009-01-01
Supplement: b910325b.pdf [file b910325b.pdf]

## Supporting Information

### Connecting Micelles by Metallo-Supramolecular Interactions: Toward Stimuli Responsive Hierarchical Materials

Pierre Guillet, Clément Mugemana, Florian J. Stadler, Ulrich S. Schubert, Charles-André Fustin\*, Christian Bailly\*, Jean-François Gohy\*

#### Materials and instrumentation

The chemicals used for this work were either purchased from Aldrich, Fluka, or Acros. All monomers were freshly purified on an  $\text{AlO}_x$ -filtration column prior to use in order to remove the inhibitor.  $^1\text{H-NMR}$  were recorded on a Bruker spectrometer using frequency of 500 MHz at 25°C. Chemical shifts are given in ppm downfield from TMS. Gel permeation chromatography (GPC) was carried out a system composed of two PSS Gram columns, 100 Å and 1000 Å, connected to a Waters 410 differential refractometer and a Waters UV detector with DMF as the eluent. Different poly(styrene) were used as standards. The initiator has been synthesized according to well-known procedures.<sup>[1]</sup>

#### Synthesis of the terpyridine-functionalized poly(*t*-butylacrylate) (PtBA)

A solution of the initiator, 2,2,5-trimethyl-3-(1-(4'-(4''-terpyridinyloxy)methyl)phenoxy)-4-phenyl-3-azahexane, in 3.6 g of purified *tert*-butylacrylate ( $2.34 \times 10^{-2}$  mol) was prepared. For a degree of polymerization (DP) of 400 (at 100 % conversion), the corresponding amount of initiator was 38 mg ( $6.47 \times 10^{-5}$  mol) and  $7.0 \times 10^{-4}$  g ( $6.47 \times 10^{-6}$  mmol) for the free nitroxide (5 % with respect to the initial initiator amount). Ten freeze-pump-thaw-cycles were applied to remove oxygen before immersing the reaction vessels in an oil bath at 125 °C. The polymerization was carried out during 22 hours to reach a conversion of 50 %. Polydispersity indices were determined by size exclusion chromatography, whereas  $^1\text{H-NMR}$  was used for the determination of the degree of polymerization by careful integration of the polymer backbone to the terpyridine end group signals.

After analysis, poly(*tert*-butylacrylate) was precipitated twice from THF into methanol/water (50/50). Analytical data are for PtBA<sub>200</sub>: <sup>1</sup>H-NMR (CDCl<sub>3</sub>): δ= 8.66 (m, 2H; H<sub>6,6''</sub>), 8.58 (m, 2H; H<sub>3,3''</sub>), 8.08 (m, 2H; H<sub>3',5'</sub>), 7.83 (m, 2H; H<sub>4,4''</sub>), 7.57-7.18 (m, 22H; *H*<sub>aromatics</sub>, H<sub>5,5''</sub>), 5.35 (m, 2H; tpyOCH<sub>2</sub>), 2.45-0.53 (m, 2400H; *H*<sub>PtBA backbone aliphatics</sub>).

GPC : M<sub>n</sub> (PDI): 26,300 g.mol<sup>-1</sup> (1.12).

### Terpyridine-functionalized PtBA-*b*-PS

A terpyridine functionalized poly(*tert*-butylacrylate) macro-initiator (350 mg, DP=200, 1.37×10<sup>-5</sup> mol), anisole (1.2 mL) and styrene (180 mg, 1.73 mmol) were transferred into a Schlenk tube. After ten freeze-pump-thaw-cycles the vessel was transferred in an oil bath at 125 °C. The polymerization was carried out during 19 hours. Polydispersity indices were determined by size exclusion chromatography, whereas <sup>1</sup>H-NMR was used for the determination of the degree of polymerization by careful integration of the polymer backbone to the terpyridine end group signals. After analysis, poly(*tert*-butylacrylate)-*b*-polystyrene was precipitated twice from THF into methanol/water (50/50).

Analytical data are for PtBA<sub>200</sub>-*b*-PS<sub>80</sub> : <sup>1</sup>H-NMR (CDCl<sub>3</sub>): δ= 8.69 (m, 2H; H<sub>6,6''</sub>), 8.62 (m, 2H; H<sub>3,3''</sub>), 8.20 (m, 2H; H<sub>3',5'</sub>), 7.93 (m, 2H; H<sub>4,4''</sub>), 7.57-6.32 (m, 400H; *H*<sub>PS backbone aromatics</sub>, *H*<sub>aromatics</sub>, H<sub>5,5''</sub>), 5.35 (m, 2H; tpyOCH<sub>2</sub>), 2.45-0.53 (m, 2640H; *H*<sub>PS backbone aliphatics</sub>, *H*<sub>PtBA backbone aliphatics</sub>).

GPC : M<sub>n</sub> (PDI): 28,500 g.mol<sup>-1</sup> (1.11).

### Micelle preparation

The copolymers were dissolved directly in ethanol at a concentration slightly above 120 g/L. The solution was left to stir during several days before any measurements. Half an equimolar (relative to the amount of terpyridine groups) of the appropriate metal chloride salt (NiCl<sub>2</sub>.6H<sub>2</sub>O, FeCl<sub>2</sub>.4H<sub>2</sub>O, ZnCl<sub>2</sub>) dissolved in ethanol was then added to the copolymer solution under vigorous stirring, to yield a final copolymer concentration of 120 g/L. Prior to use, the metal chloride salts (except the iron salt) were dried in a vacuum oven at 110°C for 48 hours. Ascorbic acid (5% wt) was added to the solution of FeCl<sub>2</sub>.4H<sub>2</sub>O to prevent the oxidation of Fe<sup>2+</sup> ions.

### Dynamic and static light scattering measurements. (DLS and SLS)

DLS and SLS experiments were performed on a Malvern CGS-3 apparatus equipped with a He-Ne laser with a wavelength of 633 nm. The measurements were done at 25 °C at several angles and at different concentration. The method of the cumulants was used to analyze DLS results, while size distribution histograms were obtained by the CONTIN method (*cf.* Figure S1 as a typical example). The polydispersity index (PDI) of the micelles was estimated from the  $\Gamma_2/\Gamma_1^2$  ratio in which  $\Gamma_1$  and  $\Gamma_2$  represent the first and second cumulant, respectively. A hydrodynamic radius  $R_h$  of 20 nm was found by extrapolating the data at scattering vector  $q = 0$  and concentration  $C = 0$ . In addition to DLS, static light scattering experiments (SLS) were performed in ethanol with concentration ranging from 1 to 10 g/L. The analysis of the scattering intensities using a Zimm plot (Figure S2) yields the weight averaged molar mass,  $M_{w,app}$ , and the  $z$ -averaged radius of gyration,  $R_g$  (Table S1). SLS yields a  $R_g = 15$  nm. Comparing this value to the  $R_h$  previously determined ( $R_h = 20$  nm), a ratio  $R_g/R_h = 0.75$  (the so-called  $\rho$ -parameter) is found, which is close to the values expected for a uniform sphere (0.774). An estimation of the aggregation number of the micelle,  $N_{agg}$ , is obtained by dividing the apparent molecular weight of the micelle by the molecular weight of the corresponding diblock copolymer.

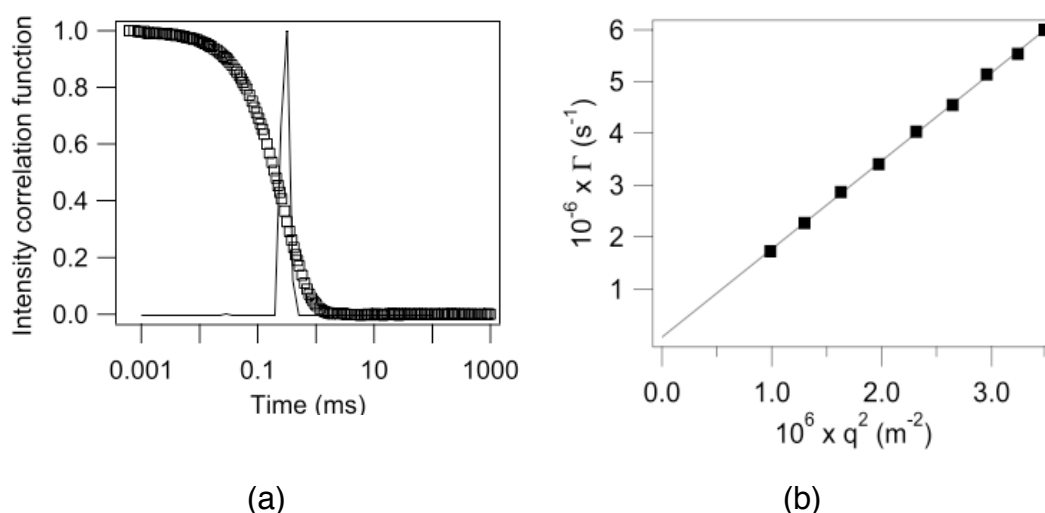

**Figure S1:** Intensity autocorrelation function and CONTIN analysis of PS-*b*-PtBA- micelles in ethanol at 90°(a), and dependence of the first cumulant frequency ( $\Gamma$ ) with the square magnitude of the scattering vector ( $q^2$ ) at 4 g/L (b).

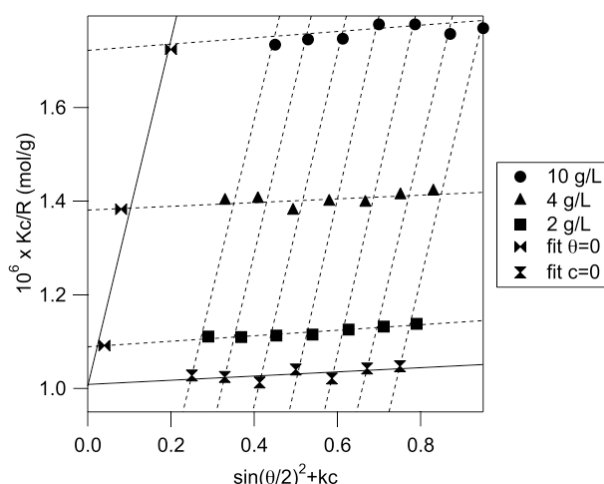

**Figure S2:** Zimm plot of PS<sub>80</sub>-*b*-PtBA<sub>200</sub>-[ micelles in ethanol at 25 °C.

**Table S1.** Characteristic parameters of the micelles formed from the PS<sub>80</sub>-*b*-PtBA<sub>200</sub>-[ copolymer in ethanol as deduced from dynamic and static light scattering experiments.

| $R_h$<br>(nm) | $R_g$<br>(nm) | $R_g/R_h$ | $M_{w,app}$<br>(g/mol) | $N_{agg}$ |
|---------------|---------------|-----------|------------------------|-----------|
| 20            | 15            | 0.75      | 950,000                | 28        |

### Rheological experiments

The rheological characterization was performed with a TA Instruments AR-G2 using a 20 mm/1° cone and plate geometry, or an ARES with a 25 mm/0.02 rad cone and plate. The measurements were carried out at RT ( $\approx$  20 °C) in an ethanol saturated atmosphere to minimize evaporation of the solvent.

Figure S3 shows the evolution of the two moduli  $G'$  and  $G''$  over a wide range of frequencies. In sharp contrast with the sample loaded with  $Zn^{2+}$  ions (Newtonian behavior), the two other samples ( $Ni^{2+}$  and  $Fe^{2+}$  ions) exhibit constant values of the two moduli over the range of investigated frequencies. This behavior is typical of a rubbery network, in agreement with the presence of cross-links between the micelles due to the formation of the metal complexes.

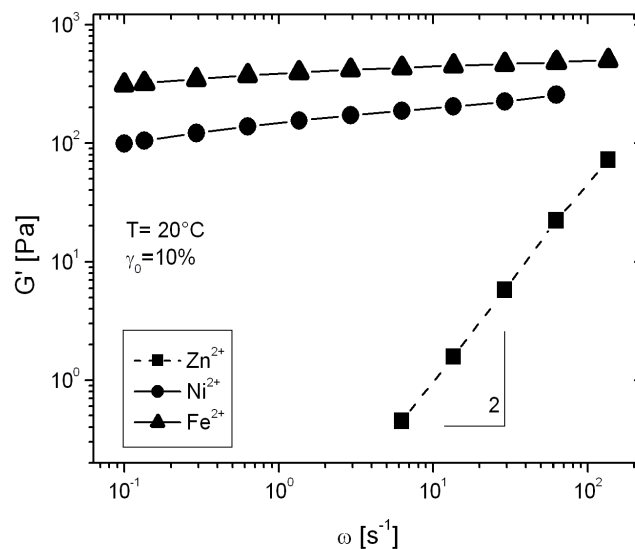

**Figure S3.** Storage modulus  $G'$  as a function of angular frequency  $\omega$  at a deformation of 10% for a micellar solution at a concentration of 12% w/v containing 0.5 equivalent of different metal salts compared to the terpyridine ligands.

#### Chemical induced breaking of the gels

20  $\mu$ L of an ethanol solution of KCN salt (6 eq.,  $1.42 \times 10^{-6}$  mol) were added to a Fe-based and Ni-based gels (12 % wt., 150  $\mu$ L). Stirring was allowed during several minutes before observing the breaking of the gel and the return to a viscous solution.

#### References

- [1] B. G. G. Lohmeijer, U. S. Schubert, *J. Polym. Sci. A: Polym. Chem.* **2004**, *42*, 4016-4027.
